# Supplementary material for: A novel membrane complex is required for docking and regulated exocytosis of lysosome-related organelles in Tetrahymena thermophila
Source: PubMed Central journal article supplement (PMC9159632; doi:10.1371/journal.pgen.1010194), 2022-05-19

S2 Fig

>TTHERM\_00658810\_MDL1

CTFSEIYAGAYQVARIQG

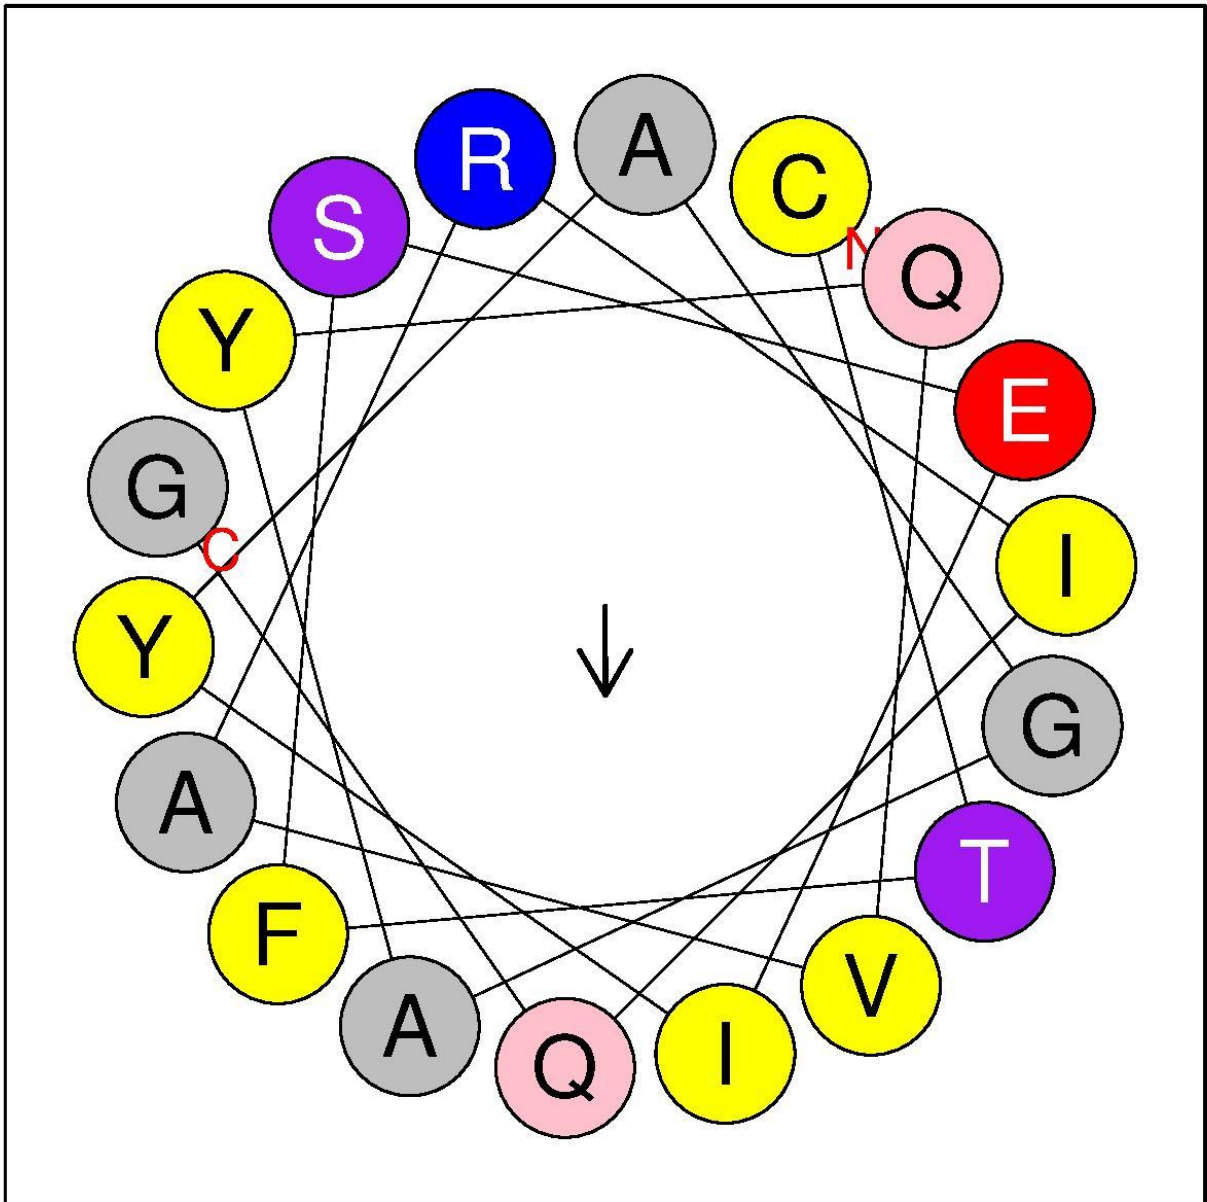

>THERM\_000193469

LCTNLELYSGAYTIARFM

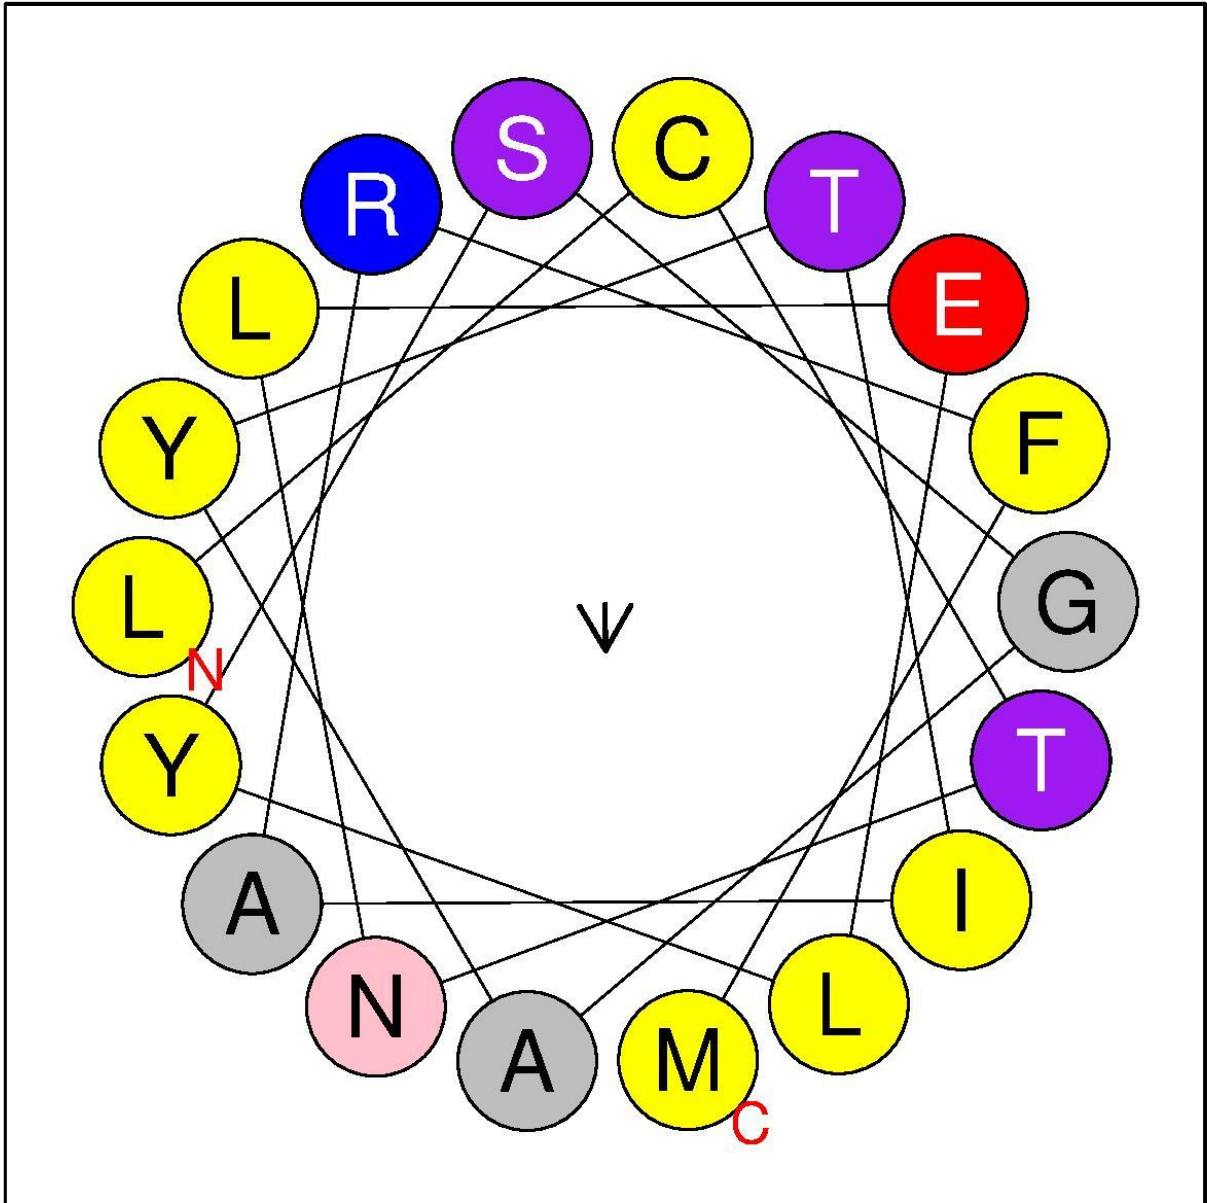

>THERM\_00047330

CNSFEILSQGFQYARSMG

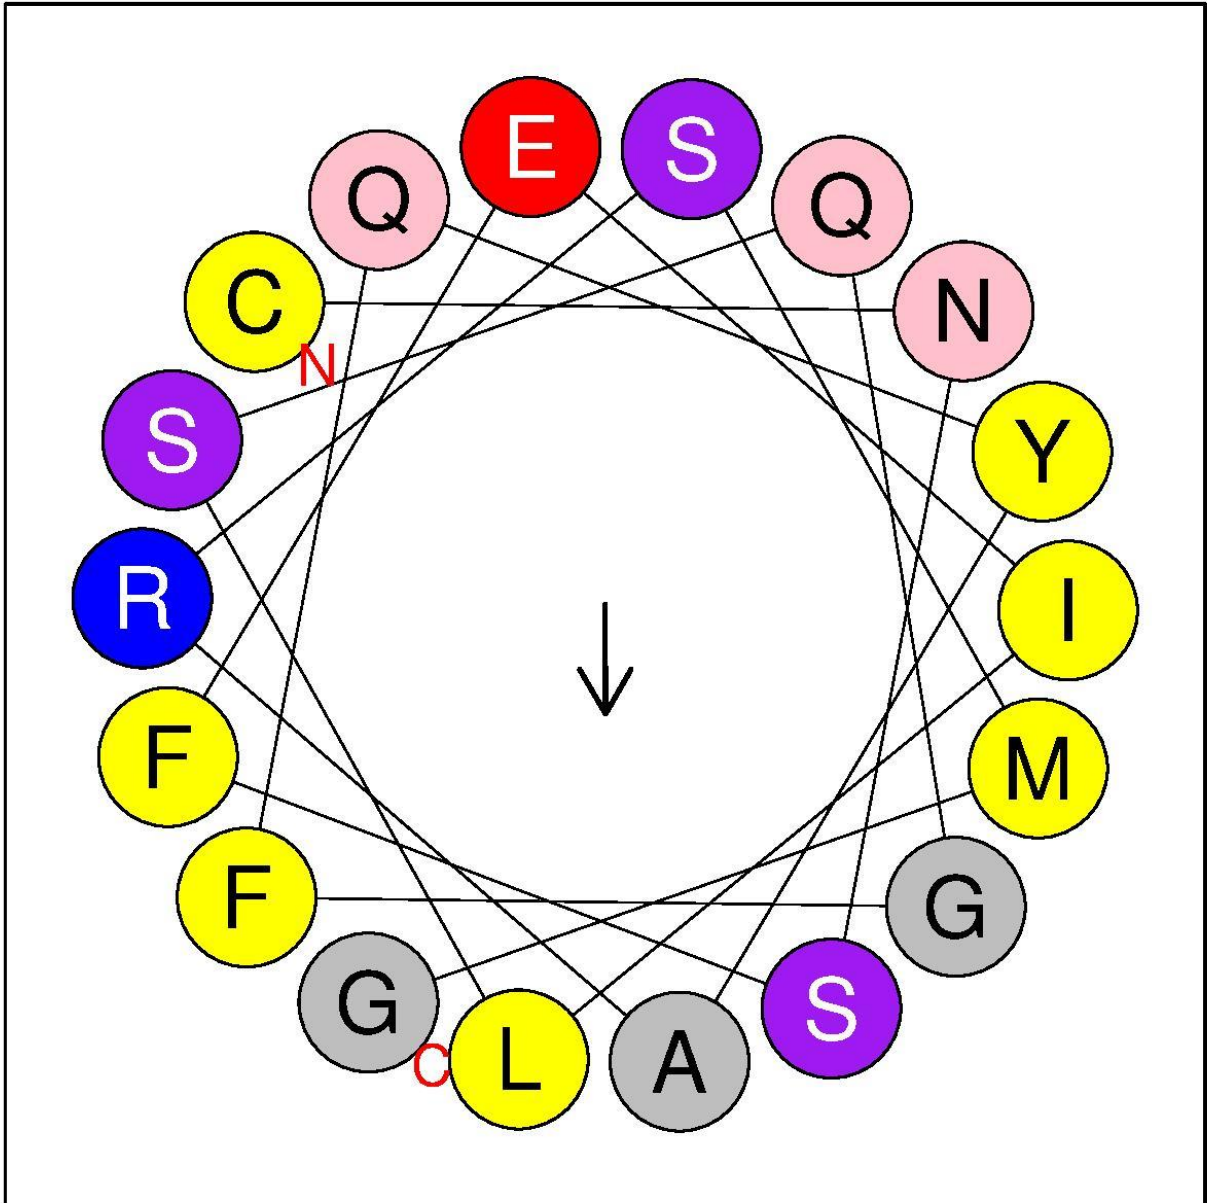

>THERM\_000486279

ISFVVKHKLQSFEIELGL

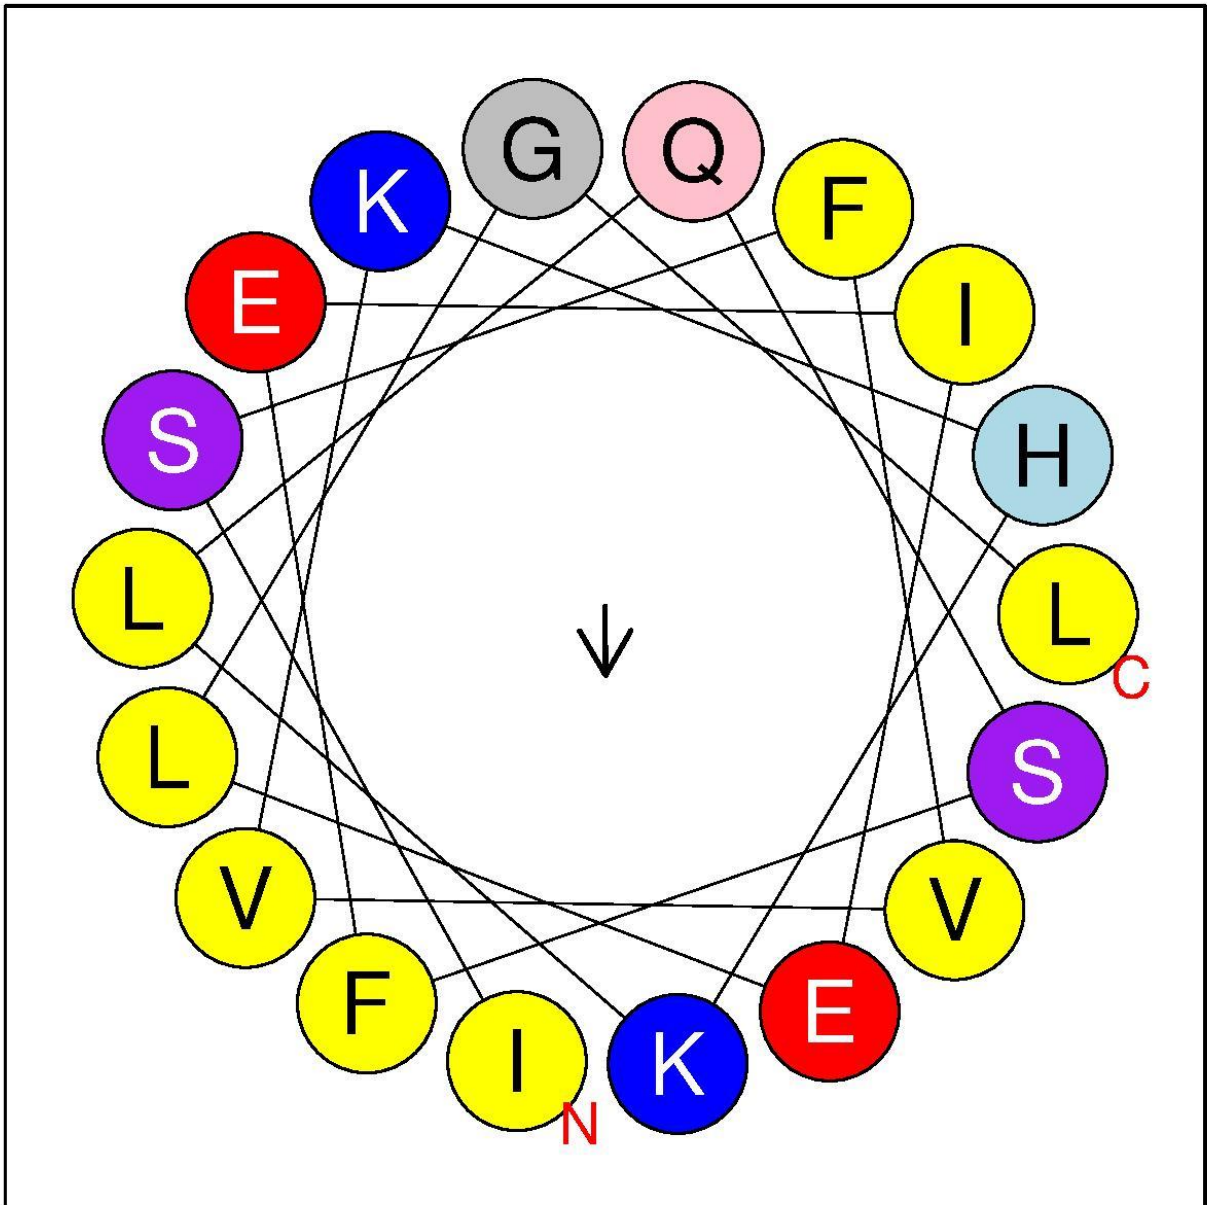

>THERM\_00141040

YEGSFTHPPCTEGVTWII

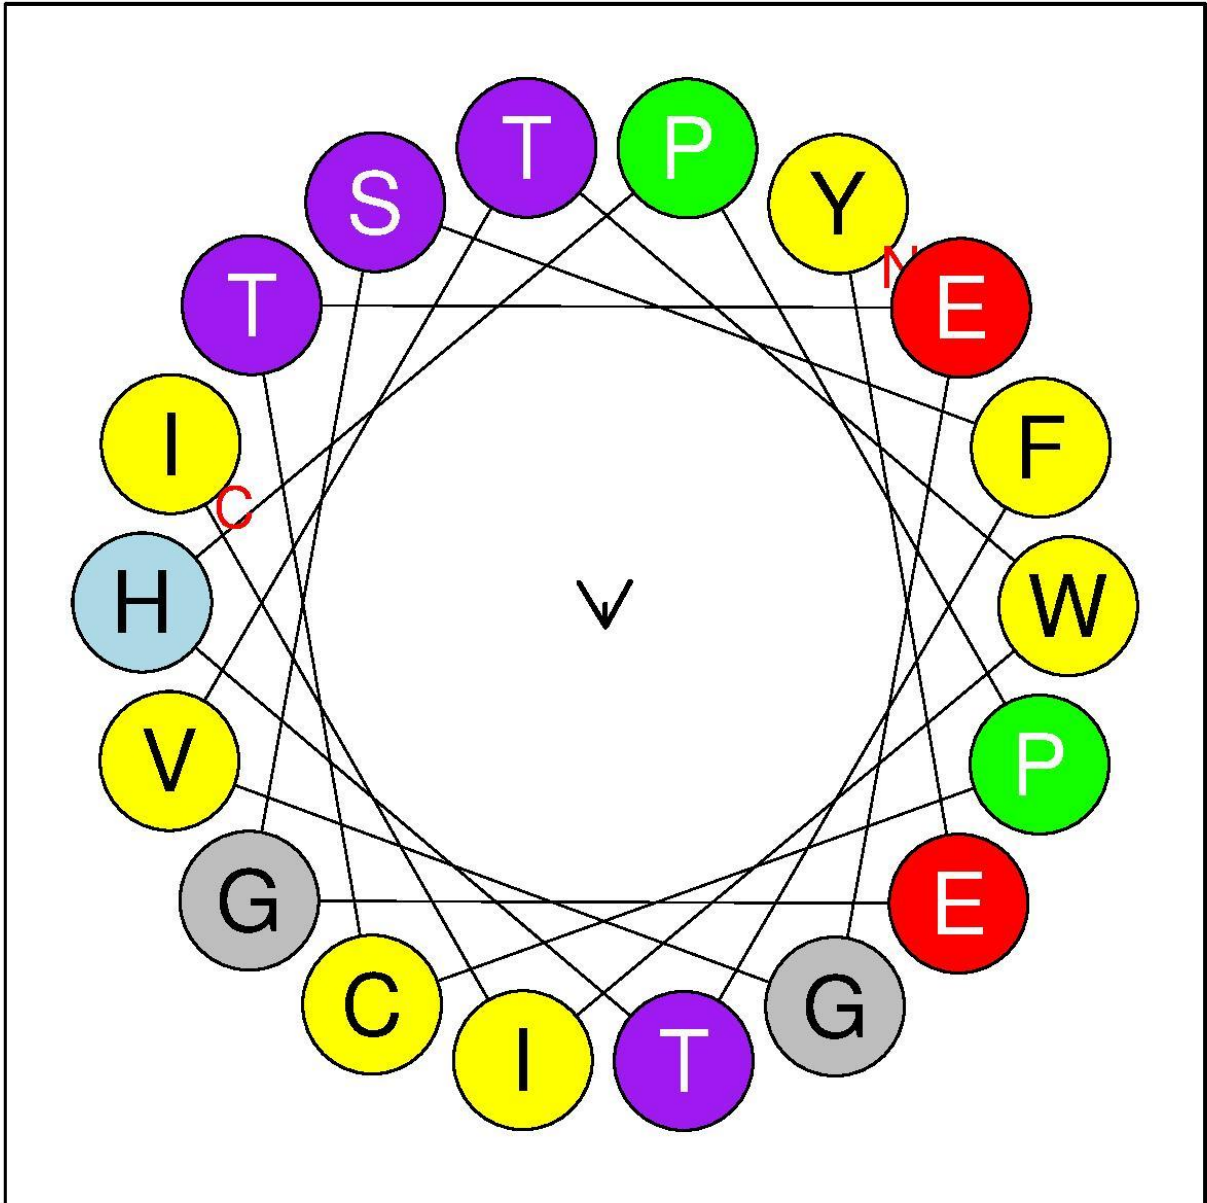

>THERM\_00227750

ETEDPAEASFGLSNIQIY

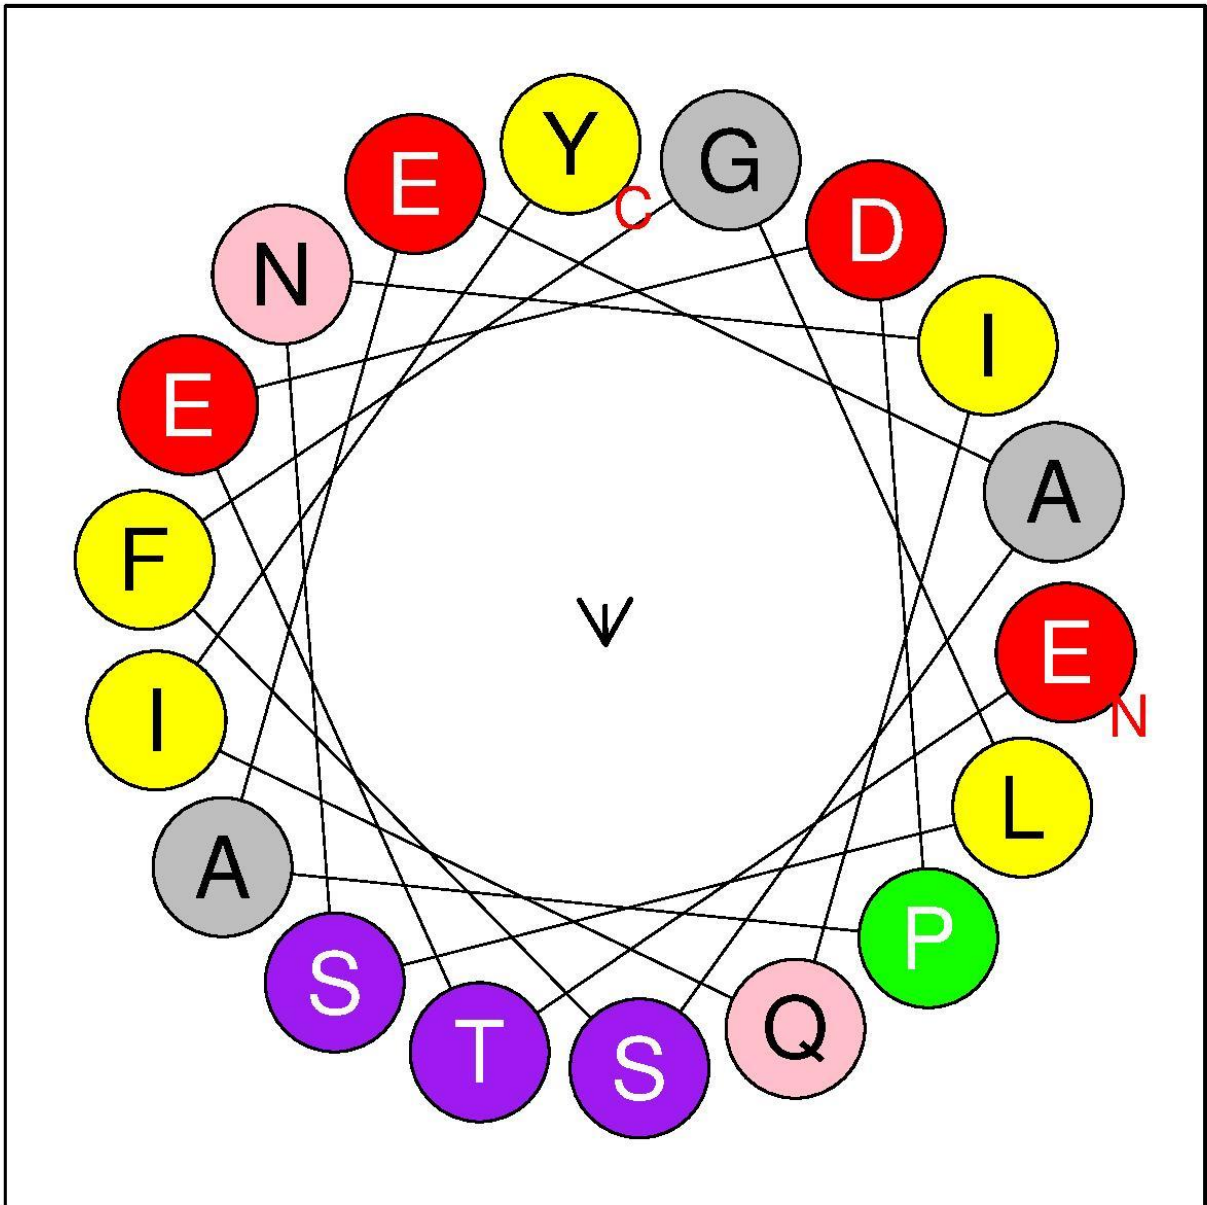

>TTHERM\_00317390

LQDDPYENSYGISNLKIY

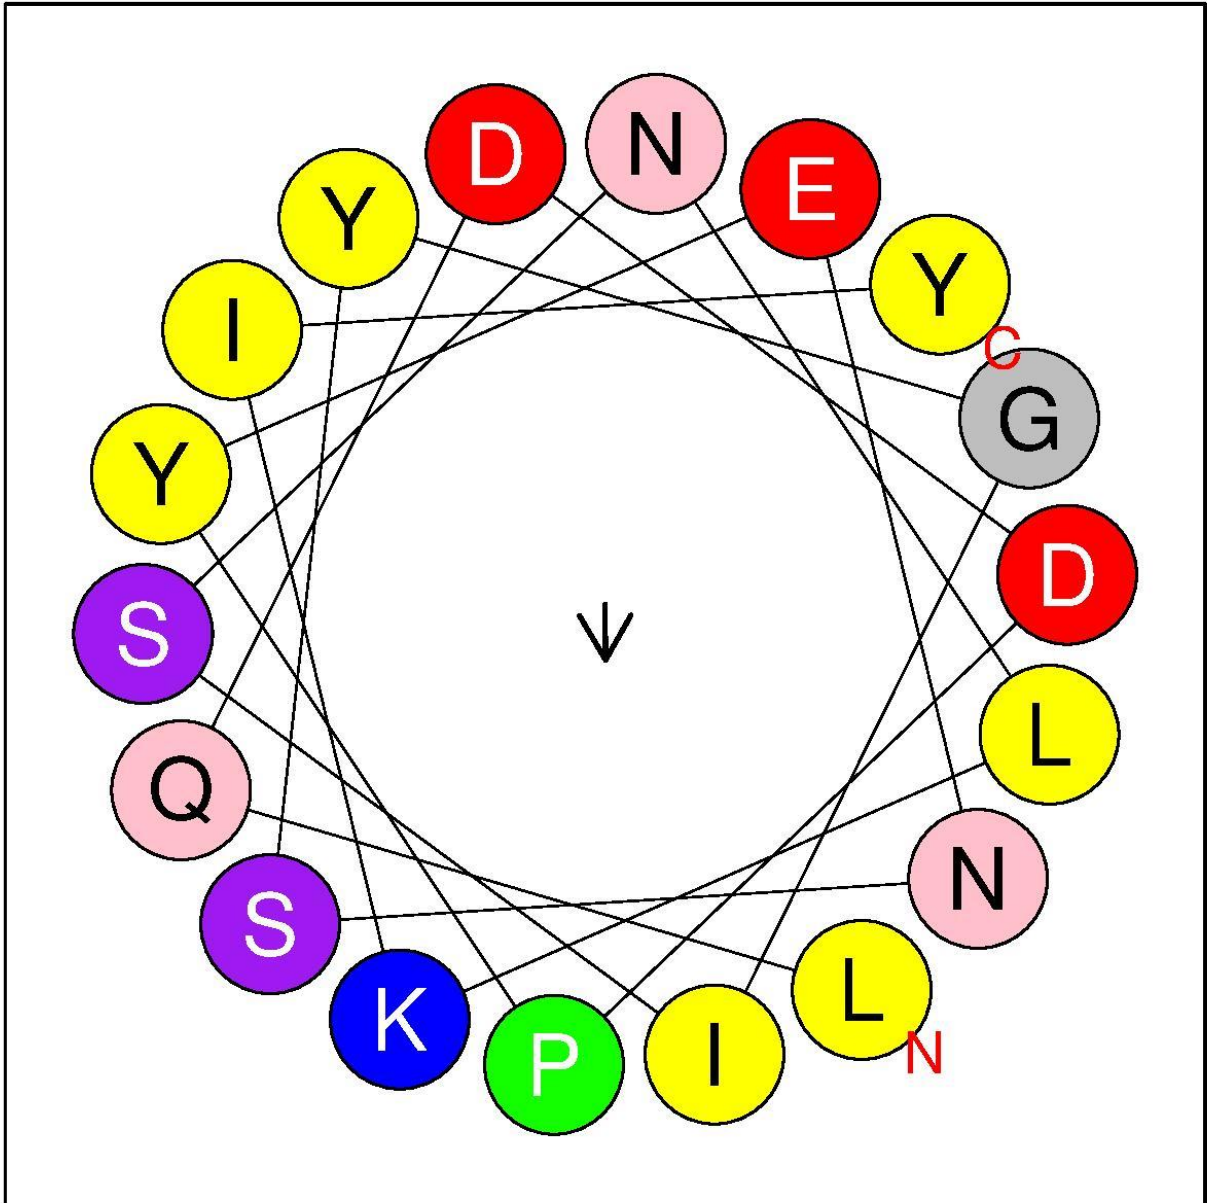

>TTHERM\_00670750

KIQARVHFFDKWEGESLS

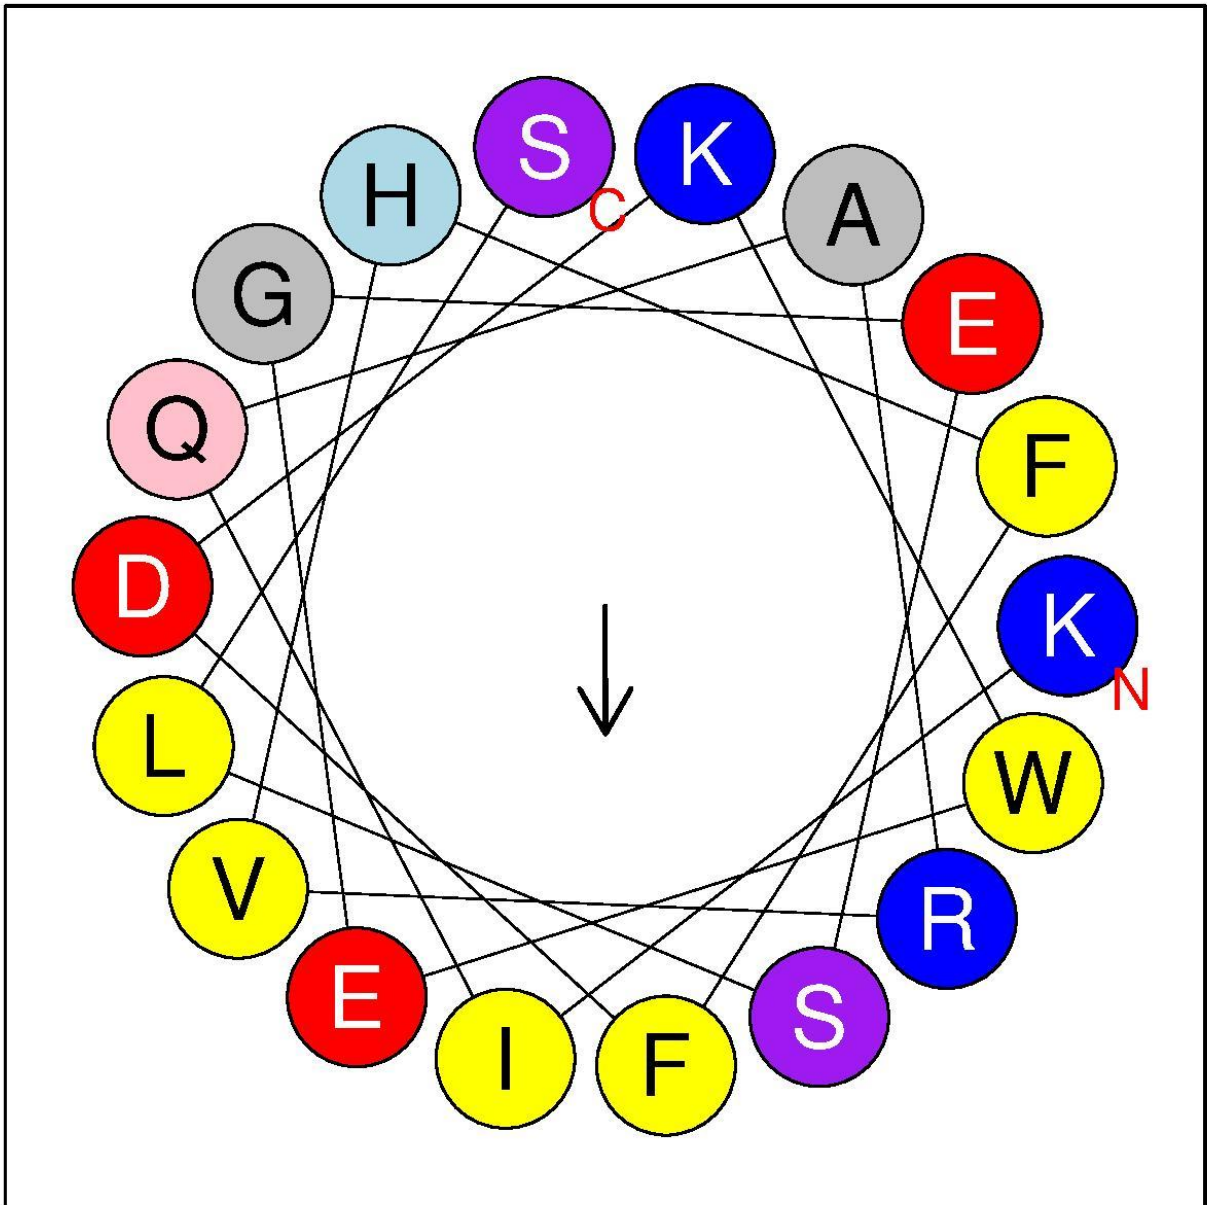



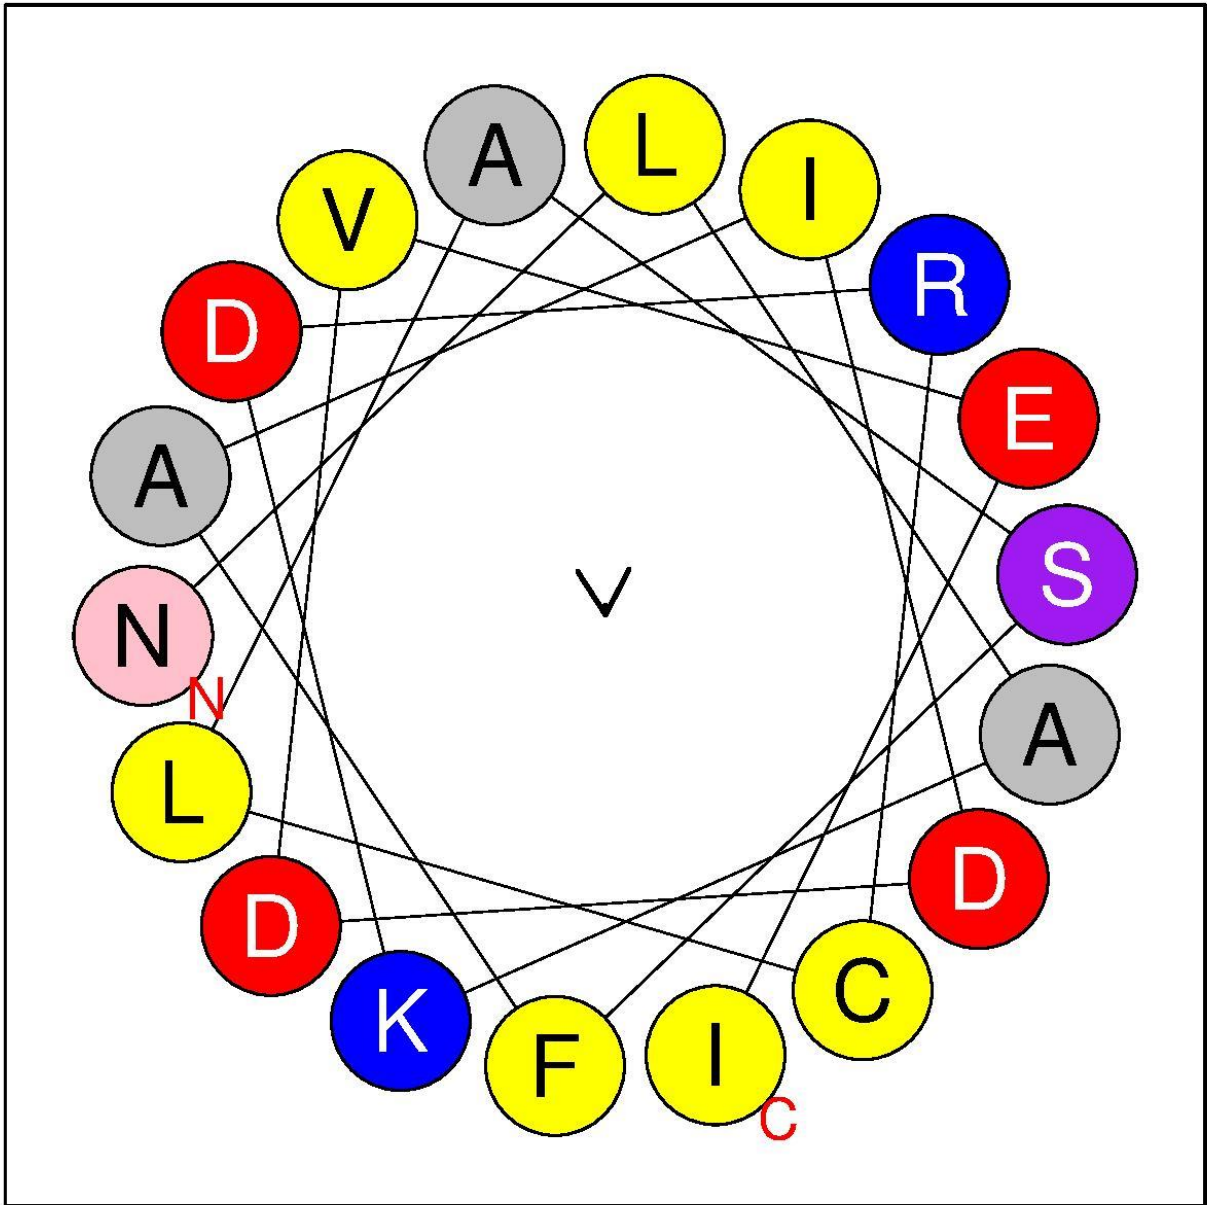

>THERM\_01122800

NVKFNIHFFDDWTGELAF

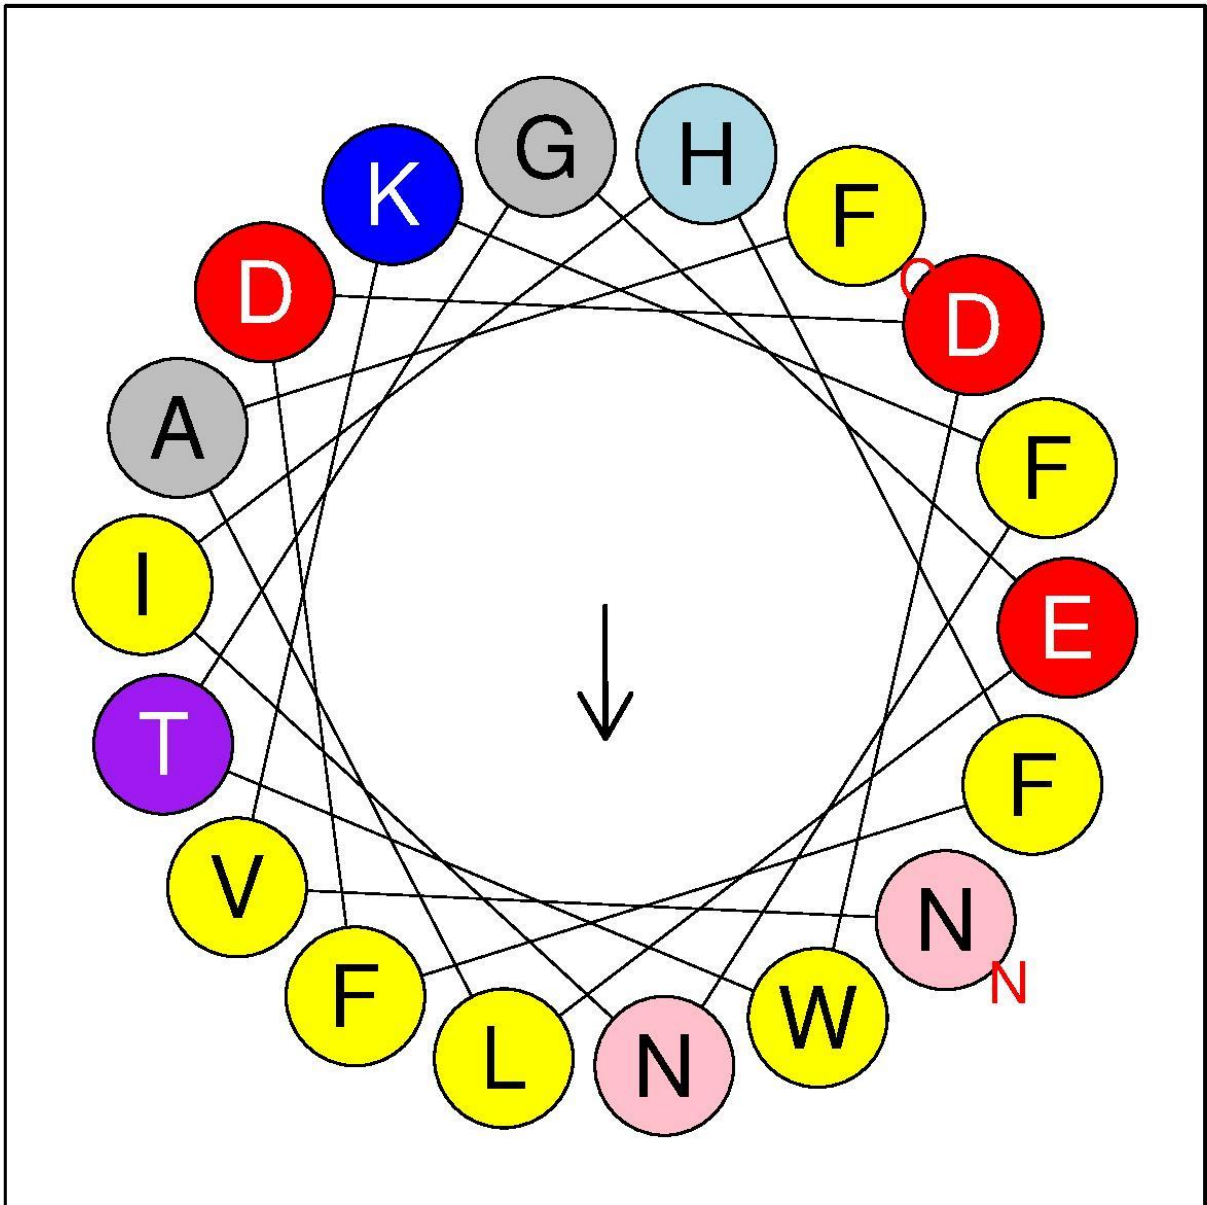

NLAKNSCDASWGIDDVQI

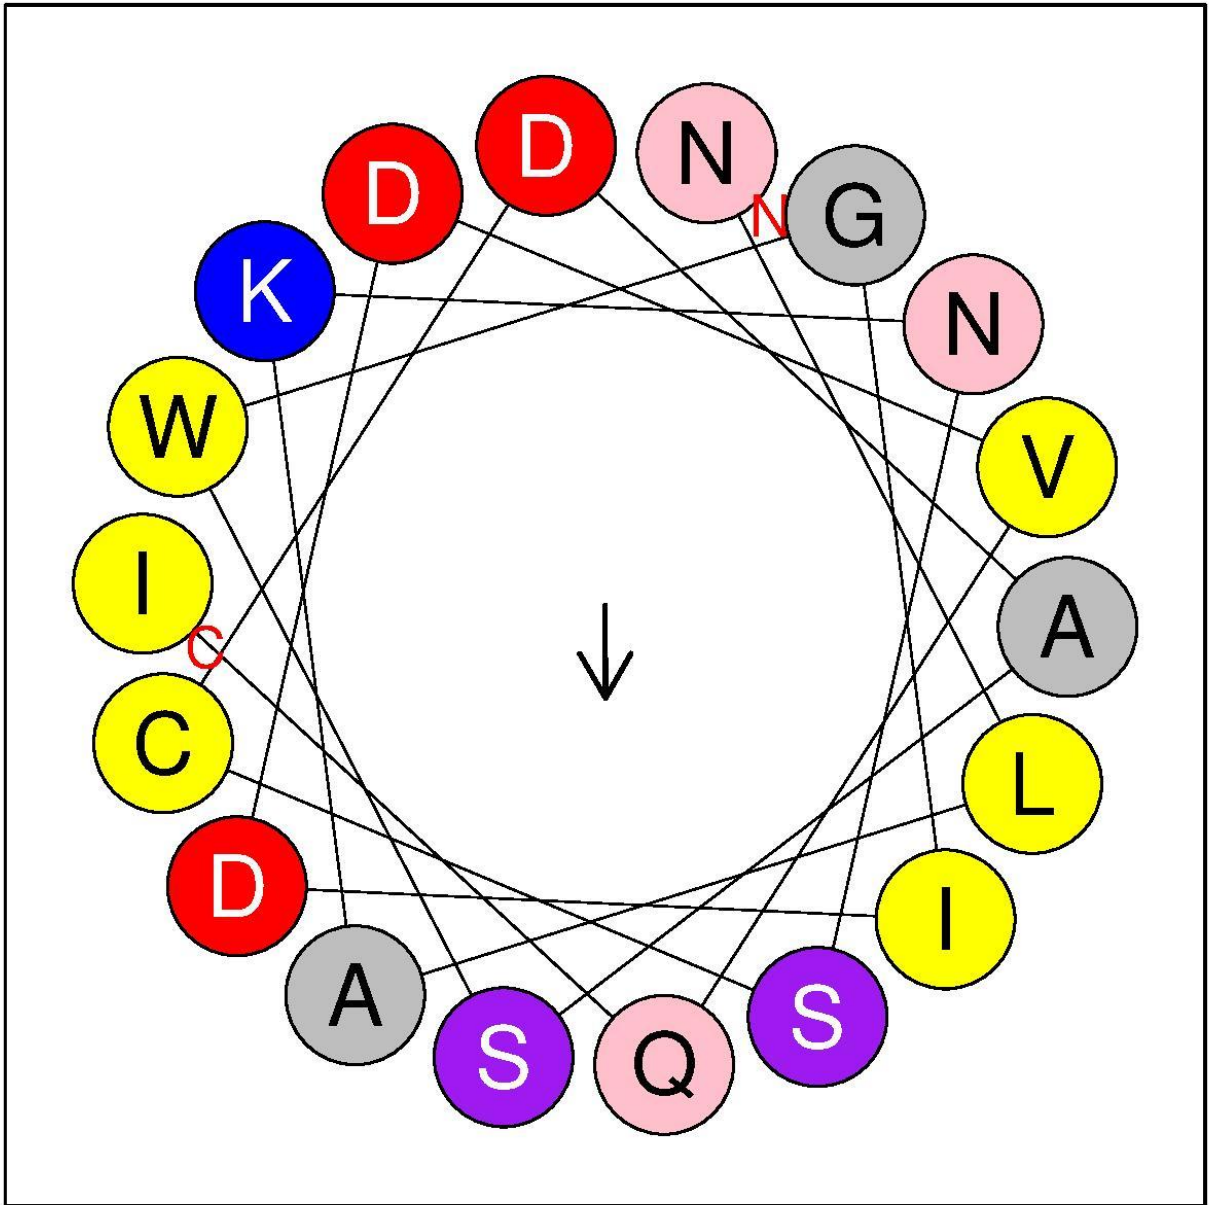

>THERM\_01213910

KLSGTLHAFDNWEGEKLY

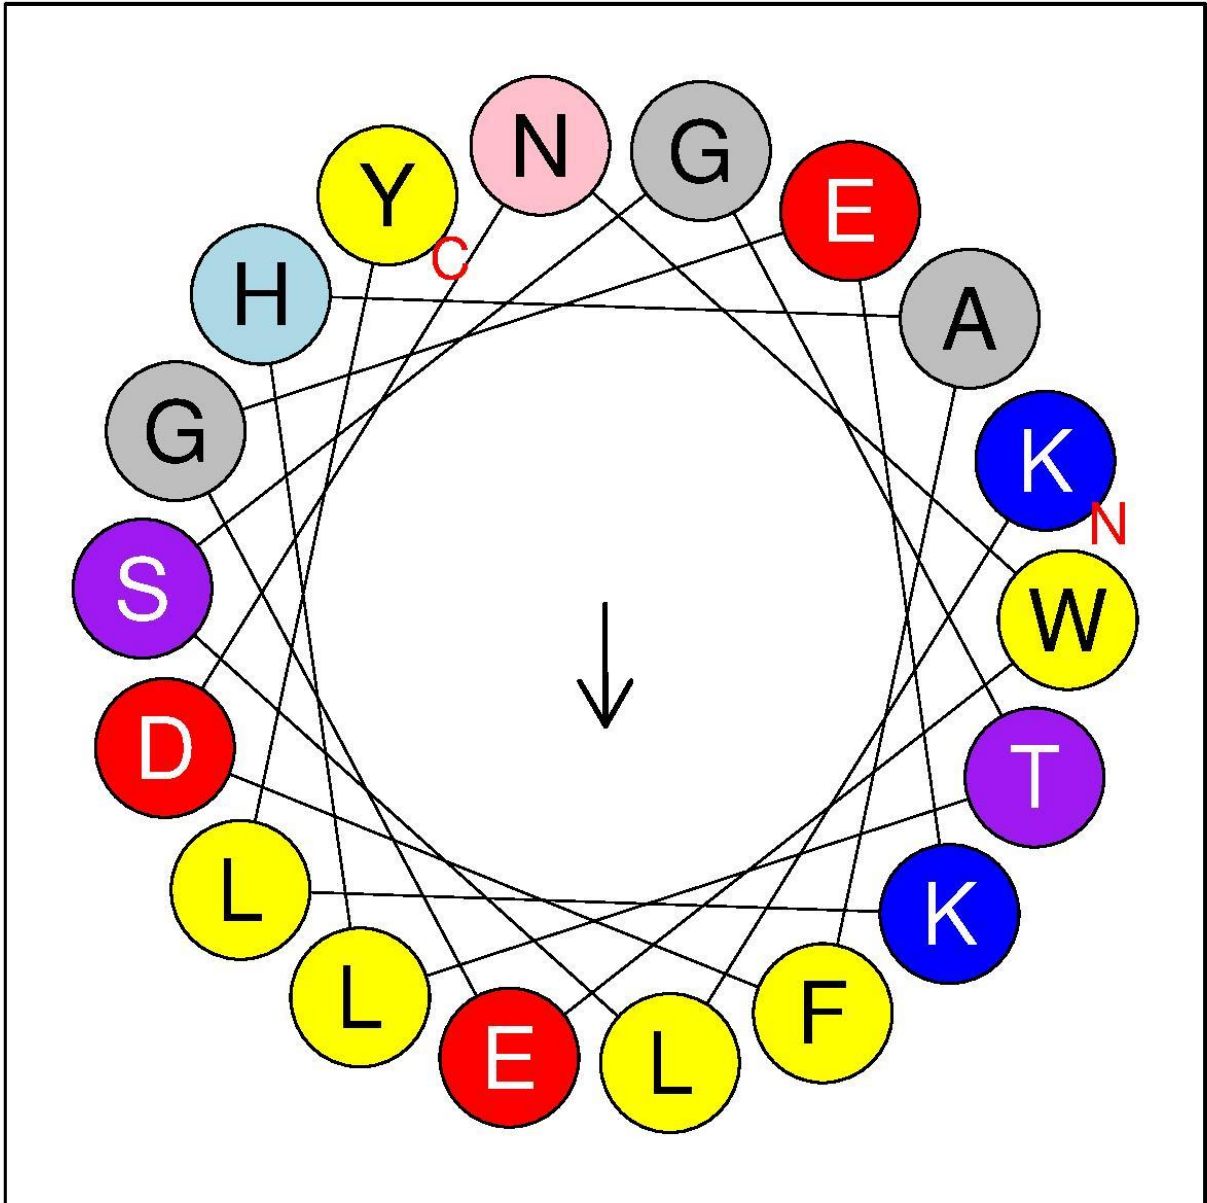

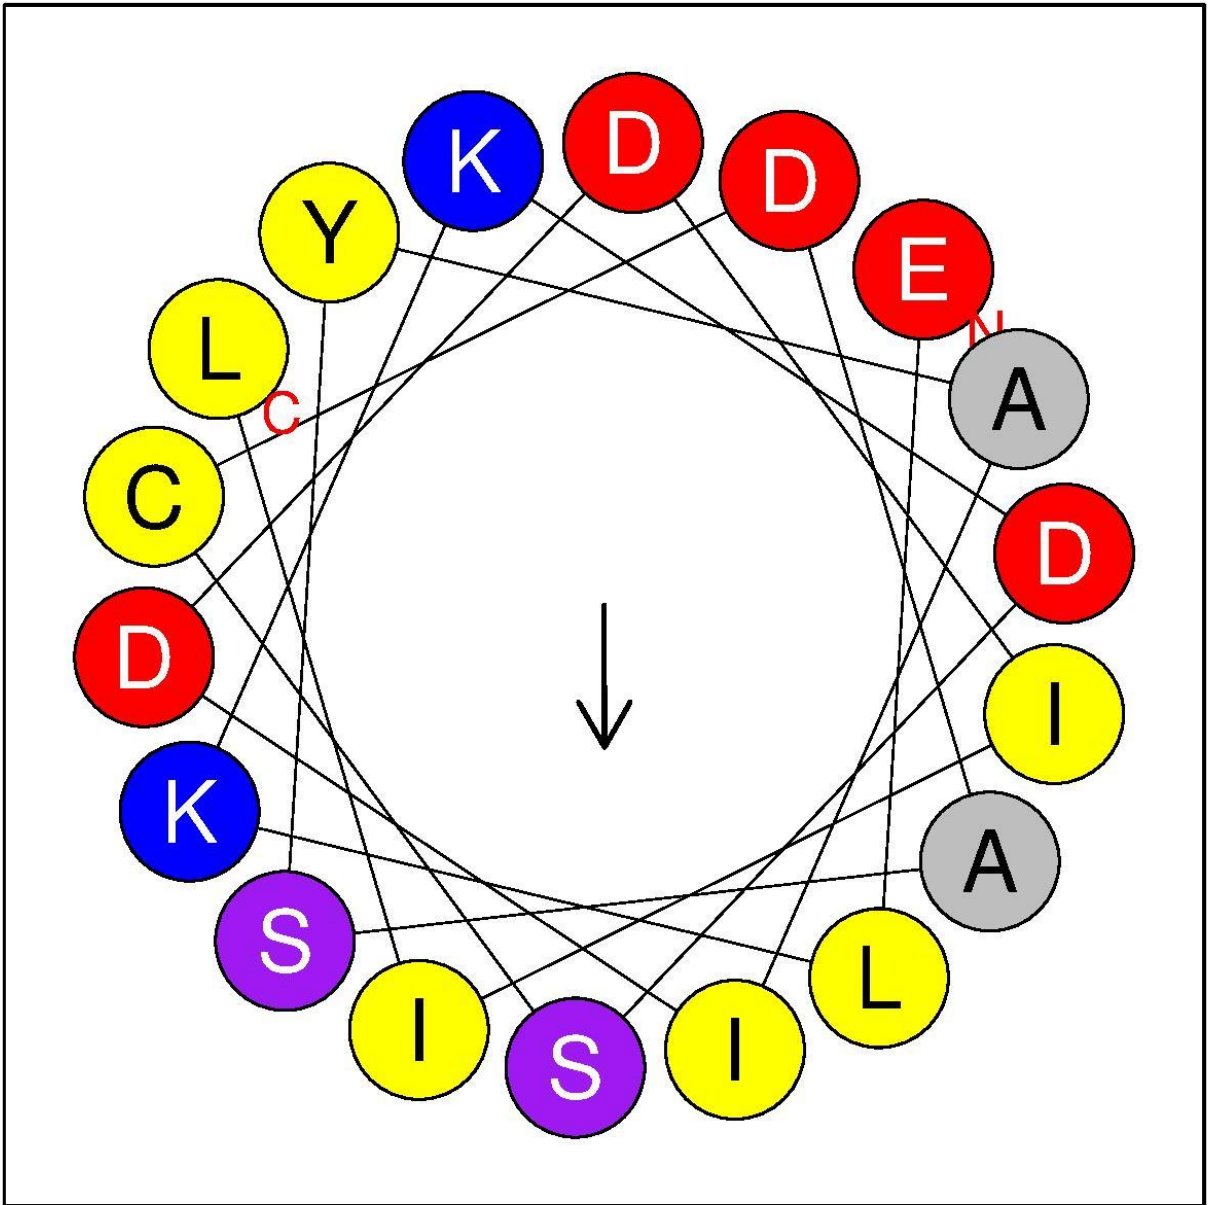

Supplement: pgen.1010194.s002.pdf [file pgen.1010194.s002.pdf]
